# Supplementary material
Source: PubMed Central journal article supplement (PMC4119107)
Supplement: 10-1055-s-0034-1368462-sup_gf789.pdf [file 10-1055-s-0034-1368462-sup_gf789.pdf]

# Übergewicht und Adipositas in der Peripartalperiode

## Teil 2: Evidenzbasierte Untersuchungen der Risiken und Interventionen

### Overweight and Obesity before, during and after Pregnancy

#### Part 2: Evidence-based Risk Factors and Interventions

#### Autoren

B. Arabin<sup>1,2,3</sup>, J. H. Stupin<sup>1,3</sup>

#### Institute

<sup>1</sup> Clara Angela Foundation, Witten und Berlin

<sup>2</sup> Phillips Universität Marburg, Mutter Kind Zentrum

<sup>3</sup> Kliniken für Geburtsmedizin, Charité-Universitätsmedizin Berlin

#### Schlüsselwörter

- Adipositas in der Schwangerschaft
- Metabolisches Syndrom
- Diabetes
- Prävention

#### Key words

- obesity during pregnancy
- metabolic syndrome
- diabetes
- prevention

#### Zusammenfassung

Adipositas ist inzwischen ein globales gesundheitliches Problem. Adipositas und starke Gewichtszunahme in der Schwangerschaft haben in Industrieländern zu einer Zunahme von Komplikationen während der Gravidität geführt, die mütterliches und kindliches Outcome beeinträchtigen. Nicht nur die präkonzeptionelle Adipositas, sondern auch die übermäßige Gewichtszunahme während der Gravidität sind verantwortlich für eine Gewichtszunahme von Frauen nach der Geburt sowie den assoziierten Risiken wie metabolisches Syndrom, kardiovaskuläre Erkrankungen und Diabetes, aber auch für Langzeitriskien der Kinder wie Adipositas, höhere Morbidität und frühere Sterblichkeit als Erwachsene. In Deutschland hat man bisher nicht adäquat auf diese Entwicklung reagiert – es gibt weder klinische Richtlinien für die Schwangerschaft, noch konzertierte Aktionen von Hebammen, Geburtsmedizinern, Gesundheitsberatern, Politik und Medien. Untersuchungsprojekte über effektive Interventionen fehlen. Dies alles wäre jedoch erforderlich, um die gesundheitlichen Risiken für Frauen und Kinder sowie die damit verbundenen Kosten für das Gesundheitssystem und letztlich für unsere Gesellschaft einzuschränken.

#### Abstract

Overweight and obesity have become a global health problem. Obesity and excessive weight gain during pregnancy have a serious impact on maternal, fetal and neonatal outcomes. Pre-conceptional obesity and excessive weight gain during pregnancy are associated with weight gain in women following childbirth leading to associated risks such as metabolic syndrome, cardiovascular disease and diabetes. Long-term risks for the offspring are an increased risk for early cardiovascular events, metabolic syndrome and decreased life expectancy as adults. German health care has not yet adequately responded to this development. There are no clinical guidelines for obesity before, during or after pregnancy, there are no concerted actions amongst midwives, obstetricians, health advisors, politicians and the media. Research projects on effective interventions are lacking although health care concepts would be urgently needed to reduce future metabolic and cardiovascular risks for women and children as well as to minimize the associated costs for the society.

eingereicht 12.3.2014

revidiert 7.4.2014

akzeptiert 10.4.2014

#### Bibliografie

**DOI** <http://dx.doi.org/10.1055/s-0034-1368462>  
Geburtsh Frauenheilk 2014; 74: 1–10 © Georg Thieme Verlag KG Stuttgart · New York · ISSN 0016-5751

#### Korrespondenzadresse

**Prof. Birgit Arabin, Dr.**  
Clara Angela Foundation  
A. Herrhausen Straße 44  
58455 Witten  
bine.clara.angela@gmail.com

#### Einleitung

Übergewicht und Adipositas sind in Industrie- und selbst in Schwellen- und Entwicklungsländern epidemisch geworden [1,2]. Für Gynäkologen sollten 4 Aspekte von Interesse sein: die erhöhte Rate mütterlicher Komplikationen und Todesfälle, die direkte Bedrohung des Kindes, die langfristigen Auswirkungen auf die Frauengesundheit sowie auf die Lebenserwartung nachfolgender Generationen.

Ad 1) Übergewicht und Adipositas erhöhen die Rate mütterlicher Komplikationen bis hin zur maternalen Mortalität. Bereits zwischen 2003 und 2005 waren > 50% aller peripartal verstorbenen Mütter in Großbritannien übergewichtig oder adipös [3]. Ursachen und Charakteristika mütterlicher Mortalität werden in Deutschland leider nicht analysiert, doch ist der Trend auch hier alarmierend.

Ad 2) Präkonzeptionelle Adipositas ist mit einer erhöhten Rate von angeborenen Fehlbildungen assoziiert, unabhängig von der Zahl schwerer er-

**Tab. 1** Evidenzkriterien und Empfehlungen nach Studienlage [13].

| Kriterien                                                                                                                        | Maßnahmen                                                                                                                      |
|----------------------------------------------------------------------------------------------------------------------------------|--------------------------------------------------------------------------------------------------------------------------------|
| I: Evidenz aufgrund wenigstens einer guten randomisierten Studie                                                                 | A. Evidenz, um klinische Konsequenzen zu empfehlen und auszuführen                                                             |
| II-1: Evidenz von gut geplanten prospektiven Studien ohne notwendige Randomisierung                                              | B. relativ gute Evidenz, um präventive oder therapeutische Maßnahmen zu empfehlen                                              |
| II-2: Evidenz von gut geplanten prospektiven oder auch retrospektiven Studien oder auch Fallkontrollstudien von mehreren Zentren | C. Evidenz nicht eindeutig genug, um Empfehlung auszusprechen, allerdings können andere Faktoren die Entscheidung beeinflussen |
| II-3: Evidenz aufgrund historischer oder lokaler vergleichender Interventionsstudien                                             | D. einige Evidenz, um gegen eine Maßnahme zu sprechen                                                                          |
| dramatische Unterschiede unkontrollierter Studien (z. B. Behandlung Penicillin 1940)                                             | E. gute Evidenz, um gegen eine Maßnahme zu sprechen                                                                            |
| III: Meinungen respektierter Autoritäten aufgrund klinischer Erfahrung, Berichten von Expertenkomitees oder Beobachtungsstudien  | L. Ungenügende Evidenz für Empfehlung, andere Kriterien können Entscheidung beeinflussen                                       |

**Tab. 2** Gewichtsklassifikation nach WHO [17], modifiziert nach kanadischen Richtlinien [13], und empfohlene Gewichtszunahme nach Institute of Medicine (IOM) [19], kommentiert durch Rasmussen [18, 40].

| Bezeichnung           | BMI (kg/m <sup>2</sup> ) | empfohlene Gewichtszunahme<br>gesamte Schwangerschaft |                     |  | 2. und 3. Trimester<br>Einlingsgravidität |
|-----------------------|--------------------------|-------------------------------------------------------|---------------------|--|-------------------------------------------|
|                       |                          | Einlingsgravidität                                    | Zwillingsgravidität |  |                                           |
| Untergewicht          | < 18,5                   | 12,5–18 kg                                            | keine Information   |  | 0,51 (0,44–0,58) kg/SSW                   |
| normales Gewicht      | 18,5–24,9                | 11,5–16 kg                                            | 17–25 kg            |  | 0,42 (0,35–0,50) kg/SSW                   |
| Übergewicht           | 25–29,9                  | 7–11,5 kg                                             | 14–23 kg            |  | 0,28 (0,23–0,33) kg/SSW                   |
| Adipositas Klasse I   | 30–34,9                  | 5–9 kg                                                | 11–19 kg            |  | 0,22 (0,17–0,27) kg/SSW                   |
| Adipositas Klasse II  | 35–39,9                  | 5–9 kg                                                | 11–19 kg            |  | 0,22 (0,17–0,27) kg/SSW                   |
| Adipositas Klasse III | > 40                     | 5–9 kg                                                | 11–19 kg            |  | 0,22 (0,17–0,27) kg/SSW                   |

kennbarer und (zu) spät diagnostizierter Fehlbildungen [4]. Nach einer britischen Kohortenstudie an 287 213 Schwangerschaften steigt das Risiko für eine Totgeburt von 4/1000 bei normalem BMI auf 6,9/1000 bei einem BMI > 30 selbst nach Korrektur mit Diabetes, Präeklampsie, Alter der Mütter, Parität oder Nikotinabusus [5]. In einer Metaanalyse wurde das Risiko bereits als doppelt so hoch beurteilt [6]. Ein dramatischer Anstieg pränataler Sterblichkeit wird bei der Kombination von fetaler Wachstumsretardierung und mütterlichem BMI > 25 gesehen mit einer „odds ratio“ (OR) von 75 und einem „95% confidence intervall“ (CI) von 14–350 [7]. Außerdem steigen (iatrogene) Frühgeburtsrate, bei Makrosomie das Risiko von neonatalen Geburtsverletzungen und neonataler Hypoglykämie.

Ad 3) Frauen mit hohem BMI haben langfristig ein erhöhtes Risiko für ein metabolisches Syndrom [8], Typ-2-Diabetes und kardiovaskuläre Spätfolgen [9].

Ad 4) Anhand von über 30 000 Datensätzen von Müttern und Kindern ab 1950 wurde gezeigt, dass Nachkommen von Müttern mit einem BMI > 30 selbst nach Korrektur von Alter, sozioökonomischem Status, Geschlecht, Geburtsgewicht und Frühgeburtslichkeit signifikant früher sterben [10] und bereits in der Jugend an Lebensqualität einbüßen [11]. Analog wurde jetzt erstmals bei überfütterten Tieren eine vermehrte Adipogenese und „Programmierung einer verkürzten Lebensdauer“ festgestellt [12]. Diese plakative Übersicht lässt uns erwachen. Paradoxerweise findet man in Deutschland zwar eine interdisziplinäre Leitlinie zum Gestationsdiabetes von > 90 Seiten, aber keine Richtlinie zum Problem der Adipositas. Dies ist umso erstaunlicher, als eine neuere Untersuchung feststellen konnte, dass Übergewicht in der Schwangerschaft inzwischen ein höheres Risiko für die spätere Ausbildung eines metabolischen Syndroms darstellt als der Gestationsdiabetes [8]. Wir sind daher gern der Aufforderung ge-

folgt, evidenzbasierte Risiken, deren Prävention und Behandlung unter Bezug auf die internationale Studienlage sowie auf bestehende internationale Richtlinien aus Kanada, den USA, Großbritannien und den Niederlanden aufzuzeigen und versuchen dabei, die Evidenz nach allgemeingültigen Kriterien zu definieren (● Tab. 1) [13–16].

## Präkonzeptionelles Übergewicht und mögliche Interventionen

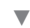

### Definition

Adipöse Menschen leiden unter ihrem Fettgewebe, definiert durch einen erhöhten Body-Mass-Index (BMI), der in Gewicht/Körpergröße (kg/m<sup>2</sup>) angegeben wird. Einteilungen der WHO finden sich in ● Tab. 2 [17], ebenso Empfehlungen aus den USA für eine Gewichtszunahme in Abhängigkeit vom BMI [18, 19], dabei ist die Datenlage für BMI-Werte > 35 noch unsicher [18]. Bei normalgewichtigen Schwangeren ist eine totale Gewichtszunahme von 11,5–16 kg akzeptabel, bei übergewichtigen Schwangeren eine Zunahme von 7–11,5 kg und bei adipösen Schwangeren eine Zunahme von 5–9 kg, Frauen mit hohem präkonzeptionellem BMI (> 35) sollten am besten nicht mehr als ca. 6 kg während der Schwangerschaft zunehmen.

Ethnische Unterschiede bestehen [20]. In den meisten Artikeln wird zur Klassifizierung – soweit bekannt – das präkonzeptionelle Gewicht oder pragmatisch das Gewicht bei der 1. Schwangerschaftskontrolle herangezogen. Während einer Schwangerschaft steigt der BMI bei ca. 50% der Mütter geringfügig, bei den anderen um ca. 5 kg/m<sup>2</sup>, aber kann nicht als Angabe für Körperfett verwandt werden, da auch eine Zunahme von intra- und extravasaler Körperflüssigkeit zu einem erhöhten BMI beitragen kann [13].

Unabhängig von Ethnizität, Alter, Rauchverhalten und Parität revidierte das Institute of Medicine (IOM) in den USA 2009 seine Empfehlungen für die Schwangerschaft (● **Tab. 2**) [19]. Trimesterspezifische Grenzwerte für eine Gewichtszunahme wurden zusätzlich durch das IOM definiert und zum ersten Mal wurden evidenzbasierte absolute und relative Risiken (RR) für Mutter und Kind für Empfehlungen herangezogen [21]. Morbide Adipositas kennzeichnet Patienten mit einem BMI von  $> 40 \text{ kg/m}^2$ . Andere Definitionen sprechen von einem Gewicht von 50–100% über dem Idealgewicht. In neuen Richtlinien wird bei adipösen Patienten außerhalb der Schwangerschaft auch der Bauchumfang sowie Komorbidität als Kriterium für eine Gewichtsreduktion herangezogen. Bisher kommen keiner Diät klare Vorteile zu [22]. Die Aufgabe einer frühen Aufklärung liegt bereits in den Händen von Kinder- und Allgemeinärzten, von Schulen und Universitäten. Bei Jugendlichen zwischen 11 und 15 Jahren waren ein gutes Frühstück und sportliche Aktivität die wichtigsten negativen Prädiktoren für Adipositas [23].

### Präkonzeptionelle Beratung und Maßnahmen

Internationale Arbeitsgruppen teilen die Meinung, dass Frauen mit Adipositas und Kinderwunsch zu einer präkonzeptionellen Beratung überwiesen werden sollten (II-B). Besonders vor einer Infertilitätsbehandlung wird eine Gewichtsreduktion empfohlen (I-A). Eine Schwangerschaft sollte erst bei einem BMI  $< 30$ , idealerweise  $< 25 \text{ kg/m}^2$  erwogen werden (I-B). Im Vergleich zu normalgewichtigen Frauen besteht bei einem BMI  $> 50$  ein Risiko für schwangerschaftsinduzierten Hypertonus (19,7 vs. 4,8%, OR 1,56; 95% CI 1,33–1,82), Gestationsdiabetes (21,1 vs. 1,5%, OR 2,04; 95% CI 1,74–2,38), Schulterdystokie (7,1 vs. 1,4%, OR 1,51; 95% CI 1,05–2,19), Kaiserschnitt (60,6 vs. 25,0%, OR 1,46; 95% CI 1,29–1,65), lange Dauer des Klinikaufenthalts (14,3 vs. 4,7%, OR 1,42; 95% CI 1,07–1,89), ein kindliches Geburtsgewicht  $\geq 4000 \text{ g}$  (38,0 vs. 11,9%, OR 1,58; 95% CI 1,38–1,80) oder  $\geq 4500 \text{ g}$  (16,9 vs. 2,1%, OR 1,87; 95% CI 1,57–2,23), für neonatale metabolische Probleme (8,5 vs. 2,0%, OR 1,50; 95% CI 1,20–1,86), für eine Aufnahme des Kindes (16,9 vs. 7,8%, OR 1,28; 95% CI 1,07–1,52) oder eine Totgeburt (1,4 vs. 0,2%, OR 1,68; 95% CI 1,00–2,82) (I) [24]. Langfristige mütterliche Risiken sind noch Osteoarthritis, bösartige Erkrankungen und Schlafapnoe, wobei regelmäßiges Training diese Risiken reduziert (II-B) [11]. Idealerweise sollte daher vor der Konzeption eine Diätberatung erfolgen [25] und berücksichtigt werden, dass bei Frauen mit einem BMI  $> 50$  häufiger ein Nikotinabusus besteht (II-2) [26], Frauen, die aufhören zu rauchen, jedoch wiederum ein erhöhtes Risiko zur Gewichtszunahme haben [27].

### Risiken im 1. Trimenon und Konsequenzen für die Praxis

#### ▼ Abortrisiko

Das Risiko auf einen Spontanabort ist bei Frauen mit Adipositas im Vergleich zu normalgewichtigen Schwangeren erhöht (OR 3,98; 95% CI, 1,06–14,92). Allerdings wurden bisher keine signifikanten Unterschiede bei übergewichtigen Schwangeren gefunden (OR 1,02; 95% CI 0,72–1,45) [28]. Das Abortrisiko steigt von 13,3% bei Normalgewicht auf 38,7% bei Adipositas (I) [29]. Schon früh wurde die Assoziation von erhöhter Abortrate und Adipositas mit einem BMI  $> 30 \text{ kg/m}^2$  bei natürlicher Konzeption innerhalb einer retrospektiven Fallkontrollstudie beschrieben (OR 1,2, 95% CI 1,01–1,46) (II-2) [18], dabei wurde auch ein erhöhtes Risiko

auf mehr als 3 Fehlgeburten festgestellt (OR 3,5, 95% CI 1,03–12,01). Mehrere Kohortenstudien belegen, dass Übergewicht und Adipositas bei Patientinnen mit Infertilitätsbehandlung das Fehlgeburtsrisiko erhöhen (I) [29–31].

### Fehlbildungen

Auch die Rate von Fehlbildungen ist bei Übergewicht und Adipositas erhöht und selbst wenn diese erst in der fortgeschrittenen Schwangerschaft oder gar aufgrund der erschwerten Sichtbarkeit post partum diagnostiziert werden [32], so ist die Entstehung doch im 1. Trimester zu suchen. Aufgrund mehrerer Studien besteht auch nach Korrektur mit anderen Variablen wie Diabetes ein etwa doppelt so hohes Risiko für Neuralrohrdefekte bei adipösen Schwangeren (II-1) [33–35].

### Maßnahmen im 1. Trimenon

Schwangere mit Adipositas sollten im Hinblick auf Ernährung, Bewegung und Gewichtszunahme beraten werden (II-2-B) und bei einem BMI  $> 30$  schon ein Diabetes-Screening angesetzt werden [15]. Ein hoher BMI ist mit niedrigem Serum Vitamin D assoziiert. Daher sollten Schwangere mit einem BMI  $> 30$  10 Mikrogramm Vitamin D während Schwangerschaft und Stillzeit einnehmen (III C) [15]. Inwieweit eine Erhöhung der Folsäuredosierung über 400 Mikrogramm einen günstigen Effekt auf eine Reduktion der Fehlbildungsrate hat, ist fraglich (III-C) [35]. Alle Schwangeren sollten bereits beim ersten Besuch bei ihrem Gynäkologen ernsthaft auf die optimale Gewichtszunahme in Abhängigkeit von ihrem BMI hingewiesen werden (● **Tab. 2**) und dass regelmäßige Aktivität Risiken reduzieren kann, wenn keine Kontraindikationen bestehen (II-1-B) [36].

Bei Frauen, denen die Kontrolle ihrer Ernährung schwerfällt, können Diätberatungen und ein Angebot gesunder Produkte und Ernährungsprotokolle hilfreich sein (I-B) [37]. Eine zusätzliche Motivation für eine Umstellung der Ernährungsgewohnheiten könnte es sein, dass Frauen, die sich zu Beginn der Schwangerschaft an die Empfehlungen gehalten haben, geringere Raten von Sectio, Bluthochdruck und pathologischer Geburtsgewichte ihrer Kinder ( $< 2500 \text{ g}$  oder  $> 4000 \text{ g}$ ) aufwiesen [36]. Randomisierte Studien zu Interventionen des Verhaltens bei normalgewichtigen und adipösen Müttern sind bisher wenig überzeugend [38], bei Diäten sollte aber auch eine einseitige Restriktion der Protein- und Energiezufuhr im Interesse des Kindes vermieden werden (III-C) [39].

### Risiken im 2. und 3. Trimenon und Konsequenzen für die Praxis

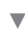

Schon im 2. Trimester können trimesterspezifische Grenzwerte [19,40] angewandt werden, um die Gewichtszunahme vorauszusagen und ggf. erneut Interventionen zu veranlassen [41].

### Intrauteriner Fruchttod

Während der Schwangerschaft sollte der Gewichtsverlauf kontrolliert werden, bei Adipositas und Übergewicht haben diese Kontrollen und daraus resultierende Beratungen eine hohe Relevanz. Eine Adipositas vor der Schwangerschaft stellt nicht nur ein Risiko für eine Fehlgeburt, sondern auch für einen intrauterinen Fruchttod dar [42], bei Frauen mit einem BMI  $> 35$  mit einer OR von 2,79, 95% CI 1,94–4,02 (II-1) [43]. Um peripartuale Risiken für eine Totgeburt  $> 22 \text{ SSW}$  zu bestimmen, wurden 96/6963 populationsbasierten Studien ausgewählt, ein BMI  $> 25$  war der Ri-

sikofaktor mit der höchsten Signifikanz (mehr als Alter und Nikotinabusus) und trug zu ca. 8000 Totgeburten/Jahr in Studien aus 5 Ländern bei (II-1) [44]. In einer aktuellen skandinavischen Studie waren diese Unterschiede weniger deutlich [45]. Gründe für das Risiko eines Fruchttods könnten sein, dass fetale Bewegungsarmut weniger gut empfunden wird, Hyperlipidämie den placentaren Blutfluss limitiert und Schlafapnoe mit fetaler Hypoxie einhergehen kann [46]. Präkonzeptionelle Ernährungsberatung und Mortalitätskonferenzen bei perinatalen Todesfällen sind Schritte, um die hohe Rate von Totgeburten auch in Ländern mit hohem Einkommen zu vermindern (II-2-C) [47].

### Bluthochdruck

Blutdruckmessungen sollten bei übergewichtigen und v.a. bei adipösen Patienten mit einer weiten Manschette erfolgen, da dann Fehler geringer sind (II-B) [48]. In einer retrospektiven Studie wurden 79005 Frauen mit 55–75 kg, 9355 Frauen mit 90–120 kg und 779 Frauen mit einem Gewicht > 120 kg verglichen. Das Risiko für schwangerschaftsinduzierten Bluthochdruck stieg signifikant an: OR 2,38, 95% CI 2,24–2,52 bzw. OR 3,00, 95% CI 2,49–3,62. Entsprechend stieg auch die Rate eines HELLP-Syndroms: OR 2,34, 95% CI 1,59–3,46. Jede 10. Übergewichtige und jede 7. adipöse Frau hatte schwerwiegende Komplikationen (II-2) [49]. Dies wurde durch eine weitere prospektive Studie mit > 2000 (schwer) adipösen Frauen bestätigt (II-1) [50].

### Gestationsdiabetes

Bei adipösen Frauen ist ein vorbestehender Diabetes häufiger und rechtfertigt eine Untersuchung des Glukosespiegels im 1. Trimenon oder bei der ersten Visite [51]. In einer Kohortenstudie war die Inzidenz von Gestationsdiabetes bei Frauen mit einem BMI zwischen 30 und 34,9 und noch mehr bei Frauen mit einem BMI > 35 gegenüber Frauen mit BMI < 30 signifikant erhöht: OR 2,6, 95% CI 2,1–3,4, bzw. OR 4,0, 95% CI 3,1–5,2 (II-2) [50]. Damit stieg auch das Risiko für Kinder > 4000 g: OR 1,7, 95% CI 1,4–2,0, für adipöse Mütter: OR 2,0, 95% CI 1,5–2,3, für sehr adipöse Schwangere sowie für Kinder > 4500 g: OR 2,0, 95% CI 1,4–3,0 bzw. OR 2,4, 95% CI 1,5–3,8 (II-1) [29].

### Fehlbildungen und Ultraschalldiagnostik

Ungefähr 15% der normalerweise sichtbaren fetalen Strukturen während eines Fehlbildungsausschlusses können bei hohem BMI > 90. Perzentile nur suboptimal dargestellt werden; bei einem BMI > 95. Perzentile sind nur ca. zwei Drittel der Strukturen gut erkennbar. Daher sind Wiederholungen oder zweite Meinungen der Untersuchungen oft unerlässlich [52]. Die Herausforderung einer genauen Diagnose ist jedoch durch eine 2-fach erhöhte Rate von Neuralrohrdefekten bei Kindern von Müttern mit hohem BMI gegeben [53, 54]. Auch Herzfehlbildungen, Bauchwanddefekte und Lippen-Kiefer-Gaumenspalten wurden vermehrt gefunden [53].

### Zwillingsschwangerschaft

Nach einer populationsbasierten Kohortenstudie sind vorbestehender hoher BMI und übermäßige Gewichtszunahme in der Schwangerschaft (● Tab. 2) auch bei Zwillingsschwereidatit verbunden mit schlechterem Outcome der Kinder verbunden [55]. In einer französischen Kohortenstudie mit 514 Zwillingsschwangerschaften wiesen Mütter mit Adipositas im Vergleich zu Normalgewichtigen eine erhöhte Rate von Schwangerschaftshypertonus (34,1 vs. 17,9%,  $p=0,011$ ), Präeklampsie (27,3 vs. 14,4%,  $p=0,028$ ) und Gestationsdiabetes (22,2 vs. 4,7%,  $p<0,001$ ) auf (II-2) [56].

### Maßnahmen im 2. und 3. Trimenon

In retrospektiven Kohortenstudien konnte gezeigt werden, dass man bei 24–60% aller Primigravidae durch Aktivität im Jahr vor, aber auch noch während der Schwangerschaft eine Präeklampsie verhindern kann (II-1) [43, 44]. Als Grund wird eine Prävention von oxidativem Stress, endothelialer Dysfunktion oder ein erhöhtes Plazentawachstum vermutet [45]. Regelmäßige Aktivität und Gestationsdiabetes sind negativ korreliert, bei Schwangeren, die „zügiges“ gegenüber „sanftem“ Gehen ausübten, war ein Gestationsdiabetes um 34% reduziert [47]. Diätberatungen sind ggf. in Abhängigkeit von Gestationsdiabetes und Gewichtszunahme fortzusetzen. Soziale Stressfaktoren (s.u.) sollten besprochen und ggf. nach Unterstützung gesucht werden.

### Komplikationen und Maßnahmen sub partu

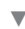

Übergewichtige und adipöse Schwangere haben erhöhte Raten von Sectio, Schulterdystokie, anästhesiologischer Probleme, Blutverlust, Thromboembolie und Wundheilungsstörungen. In einer Sprechstunde sollten Schwangere mit einem BMI > 30 vor der Geburt über Risiken und Maßnahmen informiert und dies dokumentiert werden. Eine Entbindung im Perinatalzentrum ist indiziert, da Kinder adipöser Mütter häufiger auf einer Intensivstation aufgenommen werden müssen (II-C) [57, 58].

### Sectio

Bei einer Analyse von 24 423 Erstgebärenden wurde bei einem BMI < 19,8 eine Sectiorate von 14,3%, bei einem BMI zwischen 20 und 25 eine Sectiorate von 26,5%, bei einem BMI zwischen 25 und 30 eine Sectiorate von 32,8% und bei einem BMI > 35 von 42,6% gefunden. Das erhöhte Kaiserschnittisiko stieg schrittweise an: OR 1,4, 95% CI 1,0–1,8 (BMI von 25–29,9), OR 1,5, 95% CI 1,1–2,1 (BMI 30–34,9) und OR 3,1, 95% CI 2,3–4,8 (BMI  $\geq 35$ ) [3]. Andere Studien ergaben ähnliche Ergebnisse [29, 59]. Steigende Sectioraten können auf ungenügender Geduld der Betreuer sowie der Sorge vor juristischen Folgen einer Schulterdystokie bei einer vaginal-operativen Entbindung beruhen, deren Rate in einer Studie sogar erniedrigt ist [60]. Die klinische Einschätzung des Höhenstands sub partu ist bei Adipositas komplexer. Transperineale Ultraschalluntersuchungen mit Feststellung des „angle of progression“ können die Indikation zu einer vaginal-operativen Entbindung erleichtern (III-B) [61]. Die Sorge für die Patientin mit dem Wunsch, erhöhte Komplikationen bei einer Sectio wie verlängerte Operationszeit, Blutung, Wundinfektion [62], Endometritis trotz Antibiotikaphrophylaxe [63] und Thromboembolie zu vermeiden, sollte Vorrang vor einer „defensiven Sectioindikation“ besitzen. Bei adipösen Frauen ist eine Wundinfektion häufiger: OR 9,3, 95% CI 4,5–19,2, bei Längsschnitt wurden 12% der Nähte eröffnet [62, 64]. Kliniken sollten Operationstische und Instrumente an adipöse Patienten anpassen.

Bei einem vorangegangenen Kaiserschnitt sind Versuche einer vaginalen Entbindung bei Adipositas weniger erfolgreich als bei Normalgewicht, bei einem BMI < 29 wurde eine Erfolgsrate von 54–68% angegeben [65, 66], bei steigendem Gewicht bis über 136 kg sank die Erfolgsrate auf 13% [67]. Bei einer Notsectio kann die Zeit zwischen Entscheidung und Entbindung durch anästhesiologische, logistische und operative Aspekte verlängert sein. Bei einer Dicke des subkutanen Fettgewebes von > 2 cm wird das Anlegen einer Subkutannaht empfohlen (I-A) [68].

Es gibt bereits Studien, die davon ausgehen, dass ein Kaiserschnitt per se mit einer erhöhten Rate von Diabetes und Adiposi-

tas bei den Kindern assoziiert ist [69, 70], diese Ergebnisse können jedoch variieren. In jedem Fall sind ein hoher BMI bei der Mutter und geringes fetales Wachstum mit späterer Adipositas verbunden [71].

### Vaginale Geburt

Die erhöhte Rate an Schwangerschaftsübertragung lässt vermuten, dass Adipositas die Funktion des Myometriums beeinträchtigt [43]. Bei Frauen mit einem BMI  $\geq 50$  im Vergleich zu  $< 50$  beschrieb eine dänische Kohortenstudie eine Rate von Einleitungen von 38,4 vs. 13,2% (RR: 2,91, 95% CI: 2,33–3,63), das Risiko, auch unter der Geburt Oxytocin zu benötigen, war ebenso erhöht: RR 1,41, 95% CI: 1,13–1,77 (II-1) [26]. Bei Erstgebärenden mit spontanem Geburtsbeginn und hohem BMI dauert die Eröffnungsperiode länger, die Austreibungsperiode ist eher verkürzt. Das Risiko für einen Geburtsstillstand und eine sekundäre Sectio lässt sich aufgrund der Studien nicht konkret beantworten, da diese Risiken von subjektiven Entscheidungen und dem Management unter der Geburt abhängen. Dabei können die Verwendung von Oxytocin, guter Zuspruch, Geduld, transperinealer Ultraschall zur besseren Einschätzung des Höhenstands dabei helfen, eine sekundäre Sectio mit allen beschriebenen Risiken zu vermeiden.

In der Zukunft sollte man erwägen, die Dauer der Geburt nach dem BMI zu standardisieren. Auch eine externe Dokumentation von fetaler Herzfrequenz (FHF) und Wehenfrequenz ist erschwert und kann die direkte Ableitung erfordern (III-C). Neuerdings wurde bei adipösen Frauen auch ein elektromyografisches Monitoring durchgeführt und gezeigt, dass die Effektivität dieser Registrierung besser gelingt als mit der üblichen Tokometrie [72]. Eine amerikanische Kohortenstudie mit 126080 Schwangerschaften ohne Hypertonus und Diabetes zeigte, dass bereits bei Frauen mit einem BMI  $> 30$  das Risiko auf Makrosomie erhöht ist: OR 1,4, 95% CI 1,2–1,7 (II-1). Trotzdem stieg das Risiko für Schulterdystokie nicht [73]. Dies wurde auch in einer weiteren Kohortenstudie gefunden [74]. Bei Adipositas wurde das fetale Gewicht bei einer Ultraschalleinschätzung von  $> 4000$  g in 77% überschätzt [75]. Hierdurch werden die Raten von Geburtseinleitung und primärer Sectio noch höher als nötig, da bei einer Überschätzung des Kindsgewichts die Sectiorate von 24,3 auf 42,3% steigt: RR 1,74, 95% CI, 1,09–2,78 (II-1) [76]. Die Angst vor Schulterdystokie rechtfertigt eine Sectio nicht, da man ausgerechnet hat, dass 3695 Frauen einen Kaiserschnitt hinnehmen müssten, um *einen* permanenten Schaden durch Plexuslähmung zu verhindern [77].

Geburtsverletzungen des Beckenbodens wurden bisher nicht speziell nach mütterlichem BMI untersucht und sind wohl eher von der Größe des Kindes im Verhältnis zur Mutter abhängig als von dem Phänomen der Adipositas per se.

### Peripartuale Komplikationen

In einer Fallkontrollstudie wurde das Risiko der *antenatalen* venösen Thrombose bei einem BMI  $> 25$  und Immobilisation mit einer OR von 62,3, 95% CI 11,5–337,6 und einer *postnatalen* venösen Thrombose mit einer OR von 40,1 (95% CI 8,0–201,5) im Vergleich zu Frauen mit einem BMI  $< 25$  angegeben. Bei mobilen Frauen waren diese Risiken deutlich geringer: OR 1,8, 95% CI 1,3–2,4 für die *antenatale* und OR 2,4, 95% CI 1,7–3,3 für die *postnatale* venöse Thrombose [78]. Das Risiko für eine Lungenembolie ist bei BMI  $> 30$  ebenso erhöht: OR 2,65, 95% CI 1,09–6,45 (II) [15]. Eine gewichtsadaptierte Thromboseprophylaxe mit unfractioniertem oder niedrig molekularem Heparin und adaptierter Kom-

pression ist bei weiteren Risiken und immer bei Immobilisation zu indizieren (III-C). Auch die Antibiotikaprophylaxe muss gewichtsadaptiert appliziert werden (III-C). Generell haben adipöse Mütter auch höhere peripartuale Blutverlusten, hier muss früh entgegengewirkt werden [57].

### Geburtshilfliche Anästhesie

Bei adipösen Patientinnen ist die Intubation häufiger problematisch, bei einer retrospektiven Analyse in England wurden 36/8970 (1/249) Fälle registriert, bei denen keine Intubation möglich war, der mittlere BMI dieser Patientinnen betrug dabei 33 [79]. Daher sind hier erfahrene Anästhesisten und entsprechendes Instrumentarium gefragt. Auch bei Periduralanästhesie klappt die Applikation nur in ca. 50% beim 1. Versuch [80], bei sehr adipösen Patientinnen müssen in 75% mehrere Versuche ausgeführt werden [62], ohne dass man weiß, ob eine Ultraschalldiagnostik die Applikation auch bei Schwangeren erleichtert [81]. Nach einer dänischen Kohortenstudie war bei 25% aller Frauen mit einem BMI  $> 50$  keine Leitungsanästhesie möglich [26]. Bei frustrierender Peridural- oder Spinalanästhesie muss dann doch eine Intubationsnarkose ausgeführt werden, die dann mit erhöhten Risiken für Mutter und Kind verbunden ist. Daher kann man erwägen, zu Beginn der Geburt bereits einen Periduralkatheter zu applizieren, nicht zuletzt, um in einer eventuellen Notsituation nicht zu viel Zeit zu verlieren (III-C).

### Wochenbett und Konsequenzen für die postpartuale Periode

#### ▼ Stillen und kindliche Entwicklung

Bei mütterlicher Adipositas sind Stillrate und Stilldauer reduziert [82, 83]. Dabei können anatomische Probleme beim Stillen, aber auch eine reduzierte Prolaktinausschüttung eine Rolle spielen (II-2) [84]. Randomisierte Studien haben gezeigt, dass pränatale Stillanleitungen die Rate und Dauer des Stillens erhöhen können (I-A) [85]. Bei Kindern von Müttern mit einem BMI  $> 30$  wurden auch reduzierte kognitive Fähigkeiten bis zum Schulalter festgestellt, wobei der Mechanismus noch ungeklärt ist [86].

### Interventionen des Lebensstils und Essverhaltens sowie chirurgische und pharmakologische Therapie

Eine schwedische populationsbasierte Studie mit  $> 150000$  Frauen untersuchte die Gewichtszunahme zwischen 2 Geburten und konnte zeigen, dass bei Zunahme des BMI bei der 2. Schwangerschaft das Risiko von Präeklampsie, Gestationsdiabetes, Makrosomie, Sectio und Totgeburt linear korreliert war (II-2) [77]. Eine Gewichtsabnahme von 4,5 kg zwischen 2 Schwangerschaften untersucht bei  $> 4000$  Müttern führte zu einer reduzierten Rate von Gestationsdiabetes um 40% bei der nächsten Schwangerschaft [78]. Frauen mit einem BMI  $> 30$  sollten im Hinblick auf Ernährung und Lebensstil professionell beraten werden, dies kann dann zu einer Gewichtsreduktion führen (I-A) [87–89]. Mehrere systematische Reviews von randomisierten und nicht randomisierten Interventionsstudien wurden gefunden, dabei waren die Autoren einig, dass weitere Untersuchungen nötig sind, um evidenzbasierte Empfehlungen zu erstellen [84, 85]. Eine aktuelle Übersicht bestätigt, dass Diät und Aktivitätssteigerung zu einem Gewichtsverlust beitragen, alleinige Diät birgt die Gefahr, dass auch fettfreie Masse reduziert wird, was bei zusätzlicher Aktivität kaum geschieht [90]. Erschwerend kommt hinzu, dass sich Mütter mit Adipositas im Vergleich zu Frauen mit Gestationsdia-

betes nicht ihrer späteren Risiken bewusst sind (15,5 vs. 75,0%,  $p < 0,01$ ) und auch nicht ausreichend über Modifikationen ihres Lebensstils informiert sind [91]. Dies verlangt zielgerichtete Methoden der Aufklärung und Intervention.

In einer randomisierten Studie („Lifestyle in pregnancy“, LiP Study) wurden bei 304 Schwangeren mit Adipositas verschiedene Interventionen während der Schwangerschaft wie Diät-Assistenz, kostenlose Mitgliedschaft in einem Fitnessstudio, Trainingsprogramme und persönliches Coaching angeboten und bis zur Geburt wahrgenommen. Die Interventionsgruppe wies im Vergleich zur Kontrollgruppe eine signifikant niedrigere Gewichtszunahme auf: 7,0 (4,7–10,6) vs. 8,6 (5,7–11,5) kg;  $p = 0,01$ . Allerdings war das Outcome der Kinder nicht signifikant unterschiedlich [4].

Untersuchungen während der Stillzeit fehlen. Eine Metaanalyse zeigte, dass Frauen mit Adipositas und Gestationsdiabetes im Vergleich zu Frauen ohne Gestationsdiabetes ein erhöhtes Risiko für einen Typ-2-Diabetes haben (I): RR 7,43, 95% CI 4,79–11,51 [92]. Das Risiko besteht in den ersten 5 Jahren post partum [93]. Systematische Reviews zeigen, dass adipöse Patienten von chirurgischen Maßnahmen profitieren können [94]. Inwieweit man Frauen mit Kinderwunsch bereits einem Fachchirurgen vorstellen sollte, ist widersprüchlich. Die Patienten sollten informiert werden, dass es bei einer Schwangerschaft zu chirurgischen (z. B. Banddislokation) und internistischen (z. B. Mangel an Elektrolyten und Vitaminen) Problemen kommen kann [95]. Nach Anlage eines duodenalen Bypasses zwischen 2 Graviditäten ergab der Vergleich von Kindern vor und nach der Operation eine Reduktion des kindlichen Übergewichts bis zur Pubertät von 60 auf 35% und war deutlicher bei Jungen als bei Mädchen [96]. In einer aktuelleren Studie wurden 340 Kinder von 230 Müttern mit Magenverkleinerung nachuntersucht. Nach einer Regressionsanalyse wurden keine signifikanten Unterschiede zwischen Kindern vor und nach der Operation bei der Mutter gefunden, mit 10 Jahren wogen Mädchen sogar mehr. Hiernach sollte man Frauen mit Kinderwunsch von einem chirurgischen Eingriff abraten (II-D) [97].

Im Hinblick auf medikamentöse Unterstützung wurde bei 564 nicht schwangeren Patienten mit einem BMI zwischen 30 und 40 eine Doppelblindstudie mit verschiedenen Dosierungen von dem Glucagon-like Peptid-1-Rezeptor-Agonisten Liraglutid (1,2 mg, 1,8 mg, 2,4 mg, und 3,0 mg) sowie Orlistat und Placebo durchgeführt. Alle Patienten hatten die gleiche Diät und dasselbe Fitnessprogramm. Patienten mit Liraglutid hatten einen höheren Gewichtsverlust im Vergleich zu Placebo und Orlistat, im Mittel bis zu 4,4 kg (95% CI 2,9–6,0) mehr als mit Placebo; 76% der Patienten mit 3 mg Liraglutid vs. 30% mit Placebo verloren mehr als 5% ihres Gewichts. Zusätzlich kam es zur Blutdrucksenkung und niedrigerer Prävalenz von Prä-Diabetes (I-A) [98]. Derzeit wird in einer randomisierten Doppelblindstudie untersucht, inwieweit Liraglutid auch einen Prädiabetes verhindern kann (I) [99].

### Maßnahmen auf lokaler und nationaler Ebene

Adipositas per se wird als ein so hohes Risiko für Mutter und Kind definiert, dass Richtlinien auf lokaler und nationaler Ebene erforderlich sind [100]. Das Royal College of Obstetrics and Gynecology (RCOG) rät geburtshilflichen Kliniken, Protokolle im täglichen Management von Schwangeren mit einem BMI  $> 30$  anzuwenden. Diese sollten zu folgenden Aspekten Stellung nehmen: Ausrüstung, Überweiskriterien, Anästhesie, Schwangerschaftsbegleitung, Vorbereitung und Begleitung der Geburt, Notfallvorbereitung und langfristige postnatale Betreuung. In Deutschland

wurden weder systematische Untersuchungen zur Diagnose noch zu möglichen Interventionen durchgeführt, Richtlinien sind nicht publiziert. Dabei sind nationale Informationskampagnen und Interventionsstrategien dringend erforderlich. Untersuchungen bei Hebammen und Frauenärzten haben ergeben, dass mütterliche Adipositas inzwischen zwar als ein öffentliches Problem erkannt wird, dass aber, besonders wenn die Betreuer selbst übergewichtig sind, Beratungen oft ausbleiben [101]. Wie in einer australischen Studie mit  $> 4000$  entbundenen Frauen festgestellt wurde, sind soziale Stressfaktoren wie erhöhte Parität, niedriges Einkommen und ungenügende Ausbildung mit maternaler Adipositas assoziiert [102]. Dies macht effiziente Interventionen komplexer. Hinzu kommt, dass man eine Stigmatisierung der Patientin vermeiden, sie aber doch immer wieder auf die Gefahren einer weiteren zu hohen Gewichtszunahme hinweisen muss. Gynäkologen und Hebammen sind unzureichend für strukturierte Interviews und eine effiziente Ernährungsberatung geschult [103]. Daher kann eine Überweisung zu einem Diätisten sinnvoll sein, um sich auf Ernährung und Lebensstil statt nur auf den Gewichtsverlauf zu konzentrieren. Selbst in Ländern mit etablierten Richtlinien werden erforderliche Informationen in  $> 25\%$  nicht weitergegeben [104]. Erschwerend ist die Selbsteinschätzung, da adipöse Frauen ihren BMI in 74% als zu niedrig, aber die erlaubte Gewichtszunahme in 64% zu hoch einschätzten [105]. In einer Metaanalyse von 12 internationalen Studien wurde gezeigt, dass die Besteuerung zuckerreicher Lebensmittel schon zu einer Gewichtsreduktion in der Bevölkerung führen kann (II-B) [106].

Öffentliche „Kampagnen“ im Fernsehen und in sozialen Medien könnten die Anstrengungen von Betroffenen und deren Betreuer unterstützen. In englischsprachigen Medien wurden bereits  $> 1500$  informative und interaktive iTunes und Google Plays zur Schwangerschaft gefunden („shared maternity care“) [107]. Gesundheitspolitiker sollten diese Möglichkeiten nutzen. Evidenzbasierte Interventionen und eine respektvolle Kommunikation sind von öffentlichem Interesse, nicht zuletzt, weil in einer aktuellen Studie auch die zusätzlichen Gesundheitskosten ermittelt wurden. Diese steigen jährlich in den USA und England um ca. 2 Billionen Pfund und bis 2020 voraussichtlich auf  $> 50$  Billionen Pfund/Jahr [108]. Im Vergleich zu normalgewichtigen Schwangeren wurde bei übergewichtigen, adipösen und sehr adipösen Frauen ein Anstieg von Klinikaufnahmen von 16 vs. 45 vs. 88% beschrieben. Die zusätzlichen Kosten nur für die Mütter während der Schwangerschaft betrugen für Frauen mit einem BMI  $> 40$  im Mittel 350,75 (95% CI £ 284,82–416,69) Pfund (II-2) [108].

### Fazit für die Praxis

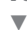

Die Zeit vor, während und nach der Schwangerschaft sollten wir als eine Chance für Interventionen begreifen, um die ansteigenden gesundheitlichen Kurz- und Langzeitriskien für Mutter und Kind zu einem frühen Zeitpunkt in der individuellen Lebensspanne zu minimieren, dann ist auch die Motivation der Patientin am höchsten. Pragmatische Vorschläge sind in Anlehnung an internationale Studien in einer provisorischen Übersicht erstellt (Abb. 1). Kein anderes Schwangerschaftsrisiko geht mit einer so hohen Fehl- und Totgeburtenrate einher. Mütter und Kinder leiden unter irreversiblen Kurz- und Langzeitriskien.

Geburtsmedizin ist ein vorwiegend präventives Fach, daher heißt es auch nicht Geburtsschirurgie. Es ist fraglich, ob die primär auf individuelle Betreuung ausgerichteten Anstrengungen einzelner

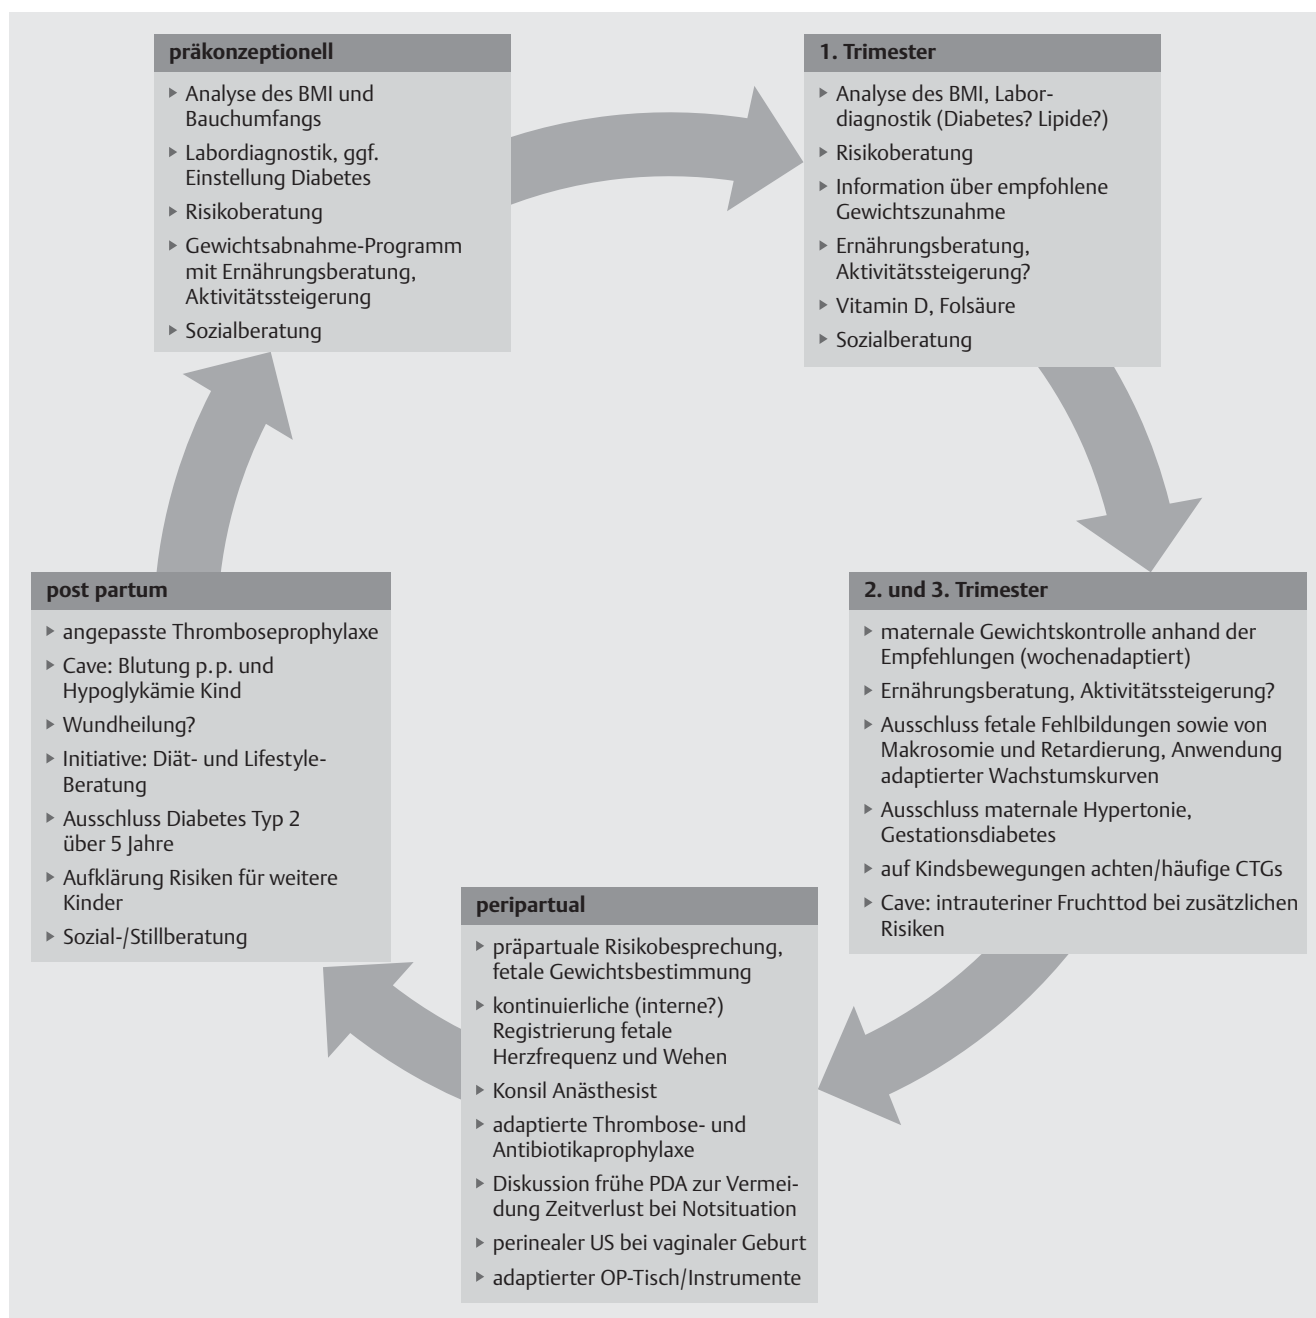

**Abb. 1** Schematisches Flussdiagramm zu Vorschlägen einer Behandlung übergewichtiger und adipöser Frauen mit Kinderwunsch und von Müttern prä-, peri- und postnatal.

Kollegen oder berufliche Standesorganisationen mit pekuniären Prioritäten dieses Problem effizient bekämpfen wollen oder können. Daher sind betroffene Mütter und Kinder auch weiterhin auf Eigeninitiative sowie gesellschaftliche und politische Anstrengungen angewiesen. Eine konzertierte Aktion von Politik, öffentlichen Medien, Allgemeinmedizinern, Hebammen und Geburtshelfern ist daher wie auch in anderen Teilgebieten der Geburtsmedizin dringend erforderlich – alles mit dem Blick auf zukünftige Generationen.

#### Interessenkonflikt

▼  
Nein.

## References

- 1 WHO. Global NCD Infobase. Geneva, Switzerland: World Health Organization; 2006
- 2 Flegal KM, Carroll MD, Kit BK *et al.* Prevalence of obesity and trends in the distribution of body mass index among US adults, 1999–2010. *JAMA* 2012; 307: 491–497
- 3 Dietz PM, Callaghan WM, Morrow B *et al.* Population-based assessment of the risk of primary cesarean delivery due to excess prepregnancy weight among nulliparous women delivering term infants. *Matern Child Health J* 2005; 9: 237–244
- 4 Vinter CA, Jensen DM, Ovesen P *et al.* The LiP (Lifestyle in Pregnancy) study: a randomized controlled trial of lifestyle intervention in 360 obese pregnant women. *Diabetes Care* 2011; 34: 2502–2507
- 5 Sebire NJ, Jolly M, Harris JP *et al.* Maternal obesity and pregnancy outcome: a study of 287,213 pregnancies in London. *Int J Obes Relat Metab Disord* 2001; 25: 1175–1182
- 6 Chu SY, Bachman DJ, Callaghan WM *et al.* Association between obesity during pregnancy and increased use of health care. *N Engl J Med* 2008; 358: 1444–1453
- 7 Frøen JF, Gardosi JO, Thurmann A *et al.* Restricted fetal growth in sudden intrauterine unexplained death. *Acta Obstet Gynecol Scand* 2004; 83: 801–807
- 8 Ijäs H, Morin-Papunen L, Keränen AK *et al.* Pre-pregnancy overweight overtakes gestational diabetes as a risk factor for subsequent metabolic syndrome. *Eur J Endocrinol* 2013; 169: 605–611
- 9 Alberti KG, Zimmet P, Shaw J. The metabolic syndrome – a new worldwide definition. *Lancet* 2005; 366: 1059–1062
- 10 Reynolds RM, Allan KM, Raja EA *et al.* Maternal obesity during pregnancy and premature mortality from cardiovascular event in adult offspring: follow-up of 1323275 person years. *BMJ* 2013; 347: f4539
- 11 Salem SY, Kessous R, Pariente G *et al.* Obesity in pregnancy: what's next? Long-term cardiovascular morbidity in a follow-up period of more than a decade. *Am J Obstet Gynecol* 2014; 210 (1. Suppl.): S45, S68
- 12 Antony K, Ma J, Mitchell K *et al.* Excess gestational weight gain (GWG) is associated with alterations in metabolic function of the microbiome. *Am J Obstet Gynecol* 2014; 210 (1. Suppl.): S45, S69
- 13 Davies GA, Maxwell C, McLeod L *et al.*; Society of Obstetricians and Gynaecologists of Canada. SOGC Clinical Practice Guidelines: Obesity in pregnancy. No. 239, February 2010. *Int J Obstet Gynecol* 2010; 32: 167–173
- 14 ACOG Committee opinion no. 549: Obesity in pregnancy. *Obstet Gynecol* 2013; 121: 213–217
- 15 CMACE/RCOG Guideline. Management of women with obesity in pregnancy. Jointly published by the Centre for Maternal and Child Enquiries and the Royal College of Obstetricians and Gynaecologists. London: 2010
- 16 NVOG. Obesitas en zwangerschap. Online: [www.nvog.nl](http://www.nvog.nl); Stand: 2009
- 17 WHO. Obesity: preventing and managing the global epidemic. WHO technical report series; 2000: 894
- 18 Rasmussen KM, Catalano PM, Yaktine AL. New guidelines for weight gain during pregnancy: what obstetrician/gynecologists should know. *Curr Opin Obstet Gynecol* 2009; 21: 521–526
- 19 Institute of Medicine (IOM). Weight gain during pregnancy: re-examining the guidelines. Committee to reexamine IOM pregnancy weight guidelines. Washington: National Research Council; 2009
- 20 Deurenberg P, Andreoli A, Borg P *et al.* The validity of predicted body fat percentage from body mass index and from impedance in samples of five European populations. *Eur J Clin Nutr* 2001; 55: 973–979
- 21 Viswanathan M, Siega-Riz AM, Moos MK. Outcomes of maternal weight gain. Evidence report/technology assessment, number 168 (AHRQ Publication No. 08-E09). Research Triangle Park, NC: RTI International–University of North Carolina Evidence-based Practice Center; 2008
- 22 Jensen MD, Ryan DH. New obesity guidelines: promise and potential. *JAMA* 2014; 311: 23–24
- 23 Haug E, Rasmussen M, Samdal O *et al.*; HBSC Obesity Writing Group. Overweight in school-aged children and its relationship with demographic and lifestyle factors: results from the WHO-Collaborative Health Behaviour in School-aged Children (HBSC) study. *Int J Public Health* 2009; 54 (Suppl. 2): 167–179
- 24 Crane JM, Murphy P, Burrage L *et al.* Maternal and perinatal outcomes of extreme obesity in pregnancy. *J Obstet Gynaecol Can* 2013; 35: 606–611
- 25 Olafsdottir AS, Skuladottir GV, Thorsdottir I *et al.* Maternal diet in early and late pregnancy in relation to weight gain. *Int J Obes (Lond)* 2006; 30: 492–499
- 26 Bonnesen B, Secker NJ, Møller LK *et al.* Pregnancy outcomes in a cohort of women with a preconception body mass index > 50 kg/m<sup>2</sup>. *Acta Obstet Gynecol Scand* 2013; 92: 1111–1114
- 27 Olafsdottir AS, Skuladottir GV, Thorsdottir I *et al.* Combined effects of maternal smoking status and dietary intake related to weight gain and birth size parameters. *BJOG* 2006; 113: 1296–1302
- 28 Metwally M, Saravelos SH, Ledger WL *et al.* Body mass index and risk of miscarriage in women with recurrent miscarriage. *Fertil Steril* 2010; 94: 290–295
- 29 Bellver J, Rossal LP, Bosch E *et al.* Obesity and the risk of spontaneous abortion after oocyte donation. *Fertil Steril* 2003; 79: 1136–1140
- 30 Fedorcsak P, Storeng R, Dale PO *et al.* Obesity is a risk factor for early pregnancy loss after IVF or ICSI. *Acta Obstet Gynecol Scand* 2000; 79: 43–48
- 31 Wang JX, Davies MJ, Norman RJ. Obesity increases the risk of spontaneous abortion during infertility treatment. *Obes Res* 2002; 10: 551–554
- 32 Dashe JS, McIntire DD, Twickler DM. Effect of maternal obesity on the ultrasound detection of anomalous fetuses. *Obstet Gynecol* 2009; 113: 1001–1007
- 33 Shaw GM, Velie EM, Schaffer D. Risk of neural tube defect-affected pregnancies among obese women. *JAMA* 1996; 275: 1093–1096
- 34 Waller DK, Mills JL, Simpson JL *et al.* Are obese women at higher risk for producing malformed offspring? *Am J Obstet Gynecol* 1994; 170: 541–548
- 35 Werler MM, Louik C, Shapiro S *et al.* Prepregnant weight in relation to risk of neural tube defects. *JAMA* 1996; 275: 1089–1092
- 36 Davies GA, Wolfe LA, Mottola MF *et al.* Exercise in pregnancy and the postpartum period. *J Obstet Gynaecol Can* 2003; 25: 516–529
- 37 Piirainen T, Isolauri E, Lagström H *et al.* Impact of dietary counselling on nutrient intake during pregnancy: a prospective cohort study. *Br J Nutr* 2006; 96: 1095–1104
- 38 Polley BA, Wing RR, Sims CJ. Randomized controlled trial to prevent excessive weight gain in pregnant women. *Int J Obes Relat Metab Disord* 2002; 26: 1494–1502
- 39 Kramer MS, Kakuma R. Energy and protein intake in pregnancy. *Cochrane Database Syst Rev* 2003; (4): CD000032
- 40 Rasmussen KM, Abrams B, Bodnar LM *et al.* Recommendations for weight gain during pregnancy in the context of the obesity epidemic. *Obstet Gynecol* 2010; 116: 1191–1195
- 41 Chmizor A, von Kries R, Rasmussen KM *et al.* Do trimester-specific cut-offs predict whether women ultimately stay within the Institute of Medicine/National Research Council guidelines for gestational weight gain? Findings of a retrospective cohort study. *Am J Clin Nutr* 2012; 95: 1432–1437
- 42 Fretts RC. Etiology and prevention of stillbirth. *Am J Obstet Gynecol* 2005; 193: 1923–1935
- 43 Cedergren MI. Maternal morbid obesity and the risk of adverse pregnancy outcome. *Obstet Gynecol* 2004; 103: 219–224
- 44 Flenady V, Koopmans L, Middleton P *et al.* Major risk factors for stillbirth in high-income countries: a systematic review and meta-analysis. *Lancet* 2011; 377: 1331–1340
- 45 Waldenström U, Aasheim V, Nilsen BV *et al.* Adverse pregnancy outcomes related to advanced maternal age compared with smoking and being overweight. *Obstet Gynecol Clin North Am* 2014; 123: 104–112
- 46 Thomas J, Paranjthy S, James D. National cross sectional survey to determine whether the decision to delivery interval is critical in emergency caesarean section. *BMJ* 2004; 328: 665
- 47 Flenady V, Middleton P, Smith GC *et al.* Stillbirths: the way forward in high-income countries. *Lancet* 2011; 377: 1703–1717
- 48 Maxwell MH, Waks AU, Schroth PC *et al.* Error in blood-pressure measurement due to incorrect cuff size in obese patients. *Lancet* 1982; 2: 33–36
- 49 Robinson HE, O'Connell CM, Joseph KS *et al.* Maternal outcomes in pregnancies complicated by obesity. *Obstet Gynecol* 2005; 106: 1357–1364
- 50 Weiss JL, Malone FD, Emig D *et al.* Obesity, obstetric complications and cesarean delivery rate – a population-based screening study. *Am J Obstet Gynecol* 2004; 190: 1091–1097
- 51 Berger H, Crane J, Farine D *et al.* Screening for gestational diabetes mellitus. *J Obstet Gynaecol Can* 2002; 24: 894–912
- 52 Wolfe HM, Sokol RJ, Martier SM *et al.* Maternal obesity: a potential source of error in sonographic prenatal diagnosis. *Obstet Gynecol* 1990; 76 (3 Pt 1): 339–342

- 53 Nuthalapaty FS, Rouse DJ. The impact of obesity on obstetrical practice and outcome. *Clin Obstet Gynecol* 2004; 47: 898–913; discussion 980–981
- 54 Anderson JL, Waller DK, Canfield MA *et al.* Maternal obesity, gestational diabetes, and central nervous system birth defects. *Epidemiology* 2005; 16: 87–92
- 55 Yeh J, Shelton JA. Association of pre-pregnancy maternal body mass and maternal weight gain to newborn outcomes in twin pregnancies. *Acta Obstet Gynecol Scand* 2007; 86: 1051–1057
- 56 Fox NS, Roman AS, Saltzman DH *et al.* Obesity and adverse pregnancy outcomes in twin pregnancies. *J Matern Fetal Neonatal Med* 2014; 27: 355–359
- 57 Usha Kiran TS, Hemmadi S, Bethel J *et al.* Outcome of pregnancy in a woman with an increased body mass index. *BJOG* 2005; 112: 768–772
- 58 Bianco AT, Smilen SW, Davis Y *et al.* Pregnancy outcome and weight gain recommendations for the morbidly obese woman. *Obstet Gynecol* 1998; 91: 97–102
- 59 Dempsey JC, Ashiny Z, Qiu CF *et al.* Maternal pre-pregnancy overweight status and obesity as risk factors for cesarean delivery. *J Matern Fetal Neonatal Med* 2005; 17: 179–185
- 60 Steinfeld JD, Valentine S, Lerer T *et al.* Obesity-related complications of pregnancy vary by race. *J Matern Fetal Med* 2000; 9: 238–241
- 61 Kalache KD, Dückelmann AM, Michaelis SA *et al.* Transperineal ultrasound imaging in prolonged second stage of labor with occipitoanterior presenting fetuses: how well does the 'angle of progression' predict the mode of delivery? *Ultrasound Obstet Gynecol* 2009; 33: 326–330
- 62 Perlow JH, Morgan MA. Massive maternal obesity and perioperative cesarean morbidity. *Am J Obstet Gynecol* 1994; 170: 560–565
- 63 Myles TD, Gooch J, Santolaya J. Obesity as an independent risk factor for infectious morbidity in patients who undergo cesarean delivery. *Obstet Gynecol* 2002; 100 (5 Pt 1): 959–964
- 64 Schneid-Kofman N, Sheiner E, Levy A *et al.* Risk factors for wound infection following cesarean deliveries. *Int J Gynaecol Obstet* 2005; 90: 10–15
- 65 Durnwald CP, Ehrenberg HM, Mercer BM. The impact of maternal obesity and weight gain on vaginal birth after cesarean section success. *Am J Obstet Gynecol* 2004; 191: 954–957
- 66 Juhasz G, Gyamfi C, Gyamfi P *et al.* Effect of body mass index and excessive weight gain on success of vaginal birth after cesarean delivery. *Obstet Gynecol* 2005; 106: 741–746
- 67 Chauhan SP, Magann EF, Carroll CS *et al.* Mode of delivery for the morbidly obese with prior cesarean delivery: vaginal versus repeat cesarean section. *Am J Obstet Gynecol* 2001; 185: 349–354
- 68 Royal College of Obstetricians and Gynaecologists (RCOG). Caesarean section. London: RCOG; 2004
- 69 Goldani MZ, Barieri MA, da Silva AA *et al.* Cesarean section and increased body mass index in school children: two cohort studies from distinct socioeconomic background areas in Brazil. *Nutr J* 2013; 12: 104
- 70 Hermansson H, Hoppu U, Isolauri E. Elective caesarean section is associated with low adiponectin levels in cord blood. *Neonatology* 2014; 105: 172–174
- 71 Maged C. The effect of mode of delivery on childhood obesity. *Am J Obstet Gynecol* 2014; 210 (Suppl. 1): 120; S77
- 72 Raban O, Hadar E, Biron-Shental T *et al.* A comparison between electrical uterine monitoring, tocodynamometry and intra uterine pressure catheter for assessment of uterine activity during labor. *Am J Obstet Gynecol* 2014; 210 (Suppl. 1): 565; S273
- 73 Sheiner E, Levy A, Menes TS *et al.* Maternal obesity as an independent risk factor for caesarean delivery. *Paediatr Perinat Epidemiol* 2004; 18: 196–201
- 74 Jensen DM, Damm P, Sørensen B *et al.* Pregnancy outcome and prepregnancy body mass index in 2459 glucose-tolerant Danish women. *Am J Obstet Gynecol* 2003; 189: 239–244
- 75 Delpapa EH, Mueller-Heubach E. Pregnancy outcome following ultrasound diagnosis of macrosomia. *Obstet Gynecol* 1991; 78 (3 Pt 1): 340–343
- 76 Parry S, Severs CP, Sehdev HM *et al.* Ultrasonographic prediction of fetal macrosomia. Association with cesarean delivery. *J Reprod Med* 2000; 45: 17–22
- 77 Sacks DA, Chen W. Estimating fetal weight in the management of macrosomia. *Obstet Gynecol Surv* 2000; 55: 229–239
- 78 Jacobsen AF, Skjeldestad FE, Sandset PM. Ante- and postnatal risk factors of venous thrombosis: a hospital-based case-control study. *J Thromb Haemost* 2008; 6: 905–912
- 79 Barnardo PD, Jenkins JG. Failed tracheal intubation in obstetrics: a 6-year review in a UK region. *Anaesthesia* 2000; 55: 690–694
- 80 Hood DD, Dewan DM. Anesthetic and obstetric outcome in morbidly obese parturients. *Anesthesiology* 1993; 79: 1210–1218
- 81 Grau T, Bartussek E, Conradi R *et al.* Ultrasound imaging improves learning curves in obstetric epidural anesthesia: a preliminary study. *Can J Anaesth* 2003; 50: 1047–1050
- 82 Amir LH, Donath S. A systematic review of maternal obesity and breastfeeding intention, initiation and duration. *BMC Pregnancy Childbirth* 2007; 7: 9
- 83 Mok E, Multon C, Piguel L *et al.* Decreased full breastfeeding, altered practices, perceptions, and infant weight change of pre-pregnant obese women: a need for extra support. *Pediatrics* 2008; 121: e1319–e1324
- 84 Rasmussen KM, Kjolhede CL. Pre-pregnant overweight and obesity diminish the prolactin response to suckling in the first week postpartum. *Pediatrics* 2004; 113: e465–e471
- 85 Dyson L, McCormick F, Renfrew MJ. Interventions for promoting the initiation of breastfeeding. *Cochrane Database Syst Rev* 2005; 2: CD001688
- 86 Paulson J, Mehta S, Sokol R *et al.* Maternal obesity and long-term cognitive function of offspring. *Am J Obstet Gynecol* 2014; 210 (Suppl. 1): 225; S446
- 87 Leermakers EA, Anglin K, Wing RR. Reducing postpartum weight retention through a correspondence intervention. *Int J Obes Relat Metab Disord* 1998; 22: 1103–1109
- 88 Lovelady CA, Garner KE, Moreno KL *et al.* The effect of weight loss in overweight, lactating women on the growth of their infants. *N Engl J Med* 2000; 342: 449–453
- 89 O'Toole ML, Sawicki MA, Artal R. Structured diet and physical activity prevent postpartum weight retention. *J Womens Health (Larchmt)* 2003; 12: 991–998
- 90 Amorim Adegboye AR, Linne YM. Diet or exercise, or both, for weight reduction in women after childbirth. *Cochrane Database Syst Rev* 2013; 7: CD005627
- 91 Siddik-Ahmad R, Garabedian M, Ianovich F *et al.* Gestational diabetes, obesity, and self-perceived risk of type 2 diabetes. *Am J Obstet Gynecol* 2014; 210 (Suppl.): S168–S169
- 92 Bellamy L, Casas JP, Hingorani AD *et al.* Type 2 diabetes mellitus after gestational diabetes: a systematic review and meta-analysis. *Lancet* 2009; 373: 1773–1779
- 93 Kim C, Newton KM, Knopp RH. Gestational diabetes and the incidence of type 2 diabetes: a systematic review. *Diabetes Care* 2002; 25: 1862–1868
- 94 Colquitt J, Clegg A, Loveman E *et al.* Surgery for morbid obesity. *Cochrane Database Syst Rev* 2005; 4: CD003641
- 95 Weiss HG, Nehoda H, Labeck B *et al.* Pregnancies after adjustable gastric banding. *Obes Surg* 2001; 11: 303–306
- 96 Kral JG, Biron S, Simard S *et al.* Large maternal weight loss from obesity surgery prevents transmission of obesity to children who were followed for 2 to 18 years. *Pediatrics* 2006; 118: e1644–e1649
- 97 Willmer M, Berglind D, Sørensen TI *et al.* Surgically induced interpregnancy weight loss and prevalence of overweight and obesity in offspring. *PLoS One* 2013; 8: e82247
- 98 Astrup A, Rössner S, Van Gaal L *et al.* Effects of liraglutide in the treatment of obesity: a randomised, double-blind, placebo-controlled study. *Lancet* 2009; 374: 1606–1616
- 99 Foghsgaard S, Vedtofte L, Mathiesen ER *et al.* The effect of a glucagon-like peptide-1 receptor agonist on glucose tolerance in women with previous gestational diabetes mellitus: protocol for an investigator-initiated, randomised, placebo-controlled, double-blinded, parallel intervention trial. *BMJ Open* 2013; 3: e003834
- 100 Authority Clinical Negligence Scheme for Trusts. Maternity clinical risk management standards. NHS Litigation Authority; 2009
- 101 Knight-Agarwal CR, Kaur M, Williams LT *et al.* The views and attitudes of health professionals providing antenatal care to women with a high BMI: a qualitative research study. *Women Birth* 2013; DOI: 10.1016/j.wombi.2013.11.002
- 102 Sutherland G, Brown S, Yelland J. Applying a social disparities lens to obesity in pregnancy to inform efforts to intervene. *Midwifery* 2013; 29: 338–343

- 103 Johnson M, Campbell F, Messina J et al. Weight management during pregnancy: a systematic review of qualitative evidence. *Midwifery* 2013; 29: 1287–1296
- 104 Wilkinson SA, Poad D, Stapleton H. Maternal overweight and obesity: a survey of clinicians' characteristics and attitudes, and their responses to their pregnant clients. *BMC Pregnancy Childbirth* 2013; 13: 117
- 105 Shub A, Huning EY, Campbell KJ et al. Pregnant women's knowledge of weight, weight gain, complications of obesity and weight management strategies in pregnancy. *BMC Res Notes* 2013; 6: 278
- 106 Cabrera Escobar MA, Veerman JL, Tollman SM et al. Evidence that a tax on sugar sweetened beverages reduces the obesity rate: a meta-analysis. *BMC Public Health* 2013; 13: 1072
- 107 Tripp N, Hainey K, Liu A et al. An emerging model of maternity care: Smartphone, midwife, doctor? *Women Birth* 2014; 27: 64–67
- 108 Denison FC, Norwood P, Bhattacharya S et al. Association between maternal body mass index during pregnancy, short-term morbidity, and increased health service costs: a population-based study. *BJOG* 2014; 121: 72–81
